# Supplementary material for: Differential effects of SARS-CoV-2 variants on central nervous system cells and blood–brain barrier functions
Source: PubMed Central journal article supplement (PMC10398935; doi:10.1186/s12974-023-02861-3), 2023-08-03
Supplement: 12974_2023_2861_MOESM1_ESM.pdf [file 12974_2023_2861_MOESM1_ESM.pdf]

| WHO label<br>Lineage             | Emergence                                | Mutations                                                                                                                                              |                                                                                                                                                       |                                                                                                                                                                         |                                                              | Impacts on <sup>3</sup>                                                                |                                                         |
|----------------------------------|------------------------------------------|--------------------------------------------------------------------------------------------------------------------------------------------------------|-------------------------------------------------------------------------------------------------------------------------------------------------------|-------------------------------------------------------------------------------------------------------------------------------------------------------------------------|--------------------------------------------------------------|----------------------------------------------------------------------------------------|---------------------------------------------------------|
|                                  |                                          | Spike <sup>1</sup>                                                                                                                                     | ORF1ab <sup>2</sup>                                                                                                                                   | Other ORFs <sup>2</sup>                                                                                                                                                 | E/M/N <sup>2</sup>                                           |                                                                                        |                                                         |
| <b>Alpha</b><br><b>B.1.1.7</b>   | United Kingdom<br><br>September 2020     | Δ69-70<br>Δ144<br>N501Y<br>A570D<br>D614G<br>P681H<br>T716I<br>S982A<br>D1118H                                                                         | ORF1a: T1001I<br>ORF1a: A1708D<br>ORF1a: I2230T<br>ORF1a: Δ3675-3677<br>ORF1b: P314L                                                                  | ORF8: Q27*<br>ORF8: R52I<br>ORF8: Y73C                                                                                                                                  | N: D3L<br>N: R203K<br>N: G204R<br>N: S235F                   | Transmissibility:<br>increased<br><br>Severity: increased                              |                                                         |
| <b>Beta</b><br><b>B.1.351</b>    | South Africa<br><br>October 2020         | D80A<br>D215G<br>Δ241-243<br>K417N<br>E484K<br>N501Y<br>D614G<br>A701V                                                                                 | ORF1a: T265I<br>ORF1a: K1655N<br>ORF1a: K3353R<br>ORF1a: Δ3675-3677<br>ORF1b: P314L                                                                   | ORF3a: Q57H                                                                                                                                                             | N: T205I<br>E: P71L                                          | Transmissibility:<br>increased<br><br>Severity: increased                              |                                                         |
| <b>Delta</b><br><b>B.1.617.2</b> | India<br><br>December 2020               | T19R<br>E156G<br>Δ157-158<br>L452R<br>T478K<br>D614G<br>P681R<br>D950N                                                                                 | ORF1b: P314L<br>ORF1b: G662S<br>ORF1b: P1000L                                                                                                         | ORF3a: S26L<br>ORF7a: V82A<br>ORF7a: T120I<br>ORF8: Δ119-120<br>ORF9b: T60A                                                                                             | N: D63G<br>N: R203M<br>N: D377Y<br>M: I82T                   | Transmissibility:<br>increased<br><br>Severity: increased                              |                                                         |
| <b>Eta</b><br><b>B.1.525</b>     | England,<br>Nigeria<br><br>December 2020 | Q52R<br>A67V<br>Δ69-70<br>Δ144<br>E484K<br>D614G<br>Q677H<br>F888L                                                                                     | ORF1a: T2007I<br>ORF1a: Δ3675-3677<br>ORF1b: P314F                                                                                                    | ORF6: Δ2                                                                                                                                                                | N: Δ2<br>N: D3Y<br>N: A12G<br>N: T205I<br>E: L21F<br>M: I82T | Transmissibility:<br>no evidence<br><br>Severity: no evidence                          |                                                         |
| <b>Omicron</b><br><b>BA.1</b>    | South Africa<br><br>November 2021        | A67V<br>Δ69-70<br>T95I<br>Δ142-144<br>Y145D<br>Δ211<br>L212I<br>G339D<br>S371L<br>S373P<br>S375F<br>K417N<br>N440K<br>G446S<br>S477N<br>T478K<br>E484A | Q493R<br>G496S<br>Q498R<br>N501Y<br>Y505H<br>T547K<br>D614G<br>H655Y<br>N679K<br>P681H<br>A701V<br>N764K<br>D796Y<br>N856K<br>Q954H<br>N969K<br>L981F | ORF1a: K856R<br>ORF1a: Δ2083<br>ORF1a: L2084I<br>ORF1a: A2710T<br>ORF1a: T3255I<br>ORF1a: P3395H<br>ORF1a: Δ3674-3676<br>ORF1a: I3758V<br>ORF1b: P314L<br>ORF1b: I1566V | ORF9b: P10S<br>ORF9b: Δ27-29                                 | N: P13L<br>N: Δ31-33<br>N: R203K<br>N: G204R<br>E: T9I<br>M: D3G<br>M: Q19E<br>M: A63T | Transmissibility:<br>increased<br><br>Severity: reduced |
